# Supplementary material for: Global analysis of the sugarcane microtranscriptome reveals a unique composition of small RNAs associated with axillary bud outgrowth
Source: PubMed Central journal article supplement — J Exp Bot. 2013 Apr 5;64(8):2307–20. doi: 10.1093/jxb/ert089 (PMC3654421; doi:10.1093/jxb/ert089), 2013-04-05

## Global analysis of the sugarcane microtranscriptome reveals a unique composition of small RNAs associated with axillary bud outgrowth

Fausto A Ortiz-Morea, Renato Vicentini, Geraldo FF Silva, Eder M. Silva, Helaine Carrer, Ana P. Rodrigues, Fabio TS Nogueira

### Supplementary Table S1. Primers used in this study

#### Stem-loop RT-PCR and quantitative PCR

| <i>small RNAs</i> | <i>Primer</i>    | <i>Primer sequence (5' -&gt; 3')</i>               |
|-------------------|------------------|----------------------------------------------------|
| miRNA529          | miR529_RT        | GTCGTATCCAGTGCAGGGTCCGAGGTATTCGCACTGGATACGACAGGCTG |
|                   | miR529_Foward    | CCTGAGAGAAGAGAGAGAGTA                              |
| miRNA159          | miR159_RT        | GTCGTATCCAGTGCAGGGTCCGAGGTATTCGCACTGGATACGAAGAGCT  |
|                   | miR159_Foward    | GCGGCGTTGGATTGAAGGG                                |
| miRNA319          | miR319_RT        | GTCGTATCCAGTGCAGGGTCCGAGGTATTCGCACTGGATACGAGGGAGC  |
|                   | miR319_Foward    | GCGGCGTTGGACTGAAGGGT                               |
| miRNA160          | miR160_RT        | GTCGTATCCAGTGCAGGGTCCGAGGTATTCGCACTGGATACGACTGGCAT |
|                   | miR160_Foward    | CCTGAGTGCCTGGCTCCCTGT                              |
| miRNA164          | miR164_RT        | GTCGTATCCAGTGCAGGGTCCGAGGTATTCGCACTGGATACGACTGCACG |
|                   | miR164_Foward    | ACTGATGTGGAGAAGCAGGGCA                             |
| miRNA171          | miR171_RT        | GTCGTATCCAGTGCAGGGTCCGAGGTATTCGCACTGGATACGACGAGTGA |
|                   | miR171_Foward    | CCTGAGTGAGCCGAACCAATA                              |
| miRcand2          | miRcand2_RT      | GTCGTATCCAGTGCAGGGTCCGAGGTATTCGCACTGGATACGACGTTCGA |
|                   | miRcand2_Foward  | TCATGATGGGGGAGCAATTCCG                             |
| sRNA29098         | sRNA29098_RT     | GTCGTATCCAGTGCAGGGTCCGAGGTATTCGCACTGGATACGACCCTCCA |
|                   | sRNA29098_Foward | TGCTGAGTCTTATAATTTGG                               |
| Universal primer  | Reverse          | GTGCAGGGTCCGAGG                                    |

**Supplementary Table S1. Continued**

| <b>Gene (accession)</b>    |         |                          |
|----------------------------|---------|--------------------------|
| SsSPL1 (TC110345)          | Foward  | CCCCCAGGTGGATGTCT        |
|                            | Reverse | TTGACAGAAGAGAGAGAGCACAGC |
| SsGAMYB (TC134732)         | Foward  | TGGCAGCCATGCCTTTTTA      |
|                            | Reverse | GGCGATGCACACTCAGATT      |
| SsDCL1 (TC143136)          | Foward  | CTGCCCATGCCAAAAGATT      |
|                            | Reverse | CATCAGGCTTGTCACGGTAA     |
| SsARF10/16 (TC141423)      | Foward  | GCTGTTGAATCCAATTTTCCA    |
|                            | Reverse | TTGCTAAGCTGGTGGTCTGTT    |
| SsSCL1 (TC151967)          | Foward  | CGAAGCTGGCAATTCATT       |
|                            | Reverse | AACGTCGAGTGGTGTGTGA      |
| SsTCP1 (TC153622)          | Foward  | CACGCAGACATGAAGGAGAA     |
|                            | Reverse | AAGAATTCGGGAATCATCC      |
| SsRibosomal 25S (TC148086) | Foward  | ATAACCGCATCAGGTCTCCAAG   |
|                            | Reverse | CCTCAGAGCCAATCCTTTTCC    |
| SsGAPDH (TC77224)          | Foward  | TTTGAATGGCAAGCTCACTG     |
|                            | Reverse | GGTGGAAACCAAATCCTCCT     |
| SsACTIN (AY742219)         | Foward  | CTTAGGTTGGATCTTGCTGG     |
|                            | Reverse | TTAGAAGCATTTTCGGTGGAC    |
| SsRPL35.4 (TC57186)        | Foward  | CTGAAGACGGAGAGGGAAAA     |
|                            | Reverse | GGCGAAGAGAACTAACAC       |

---

\* miR156 and miR444 primers have been published in Zanca *et al.* (2010).

**Supplementary Table S2. Statistics of redundant small RNA sequences from the individual libraries**

|                                                | <b>0-DAP<br/>inactive buds</b> | <b>2-DAP<br/>outgrown buds</b> |
|------------------------------------------------|--------------------------------|--------------------------------|
| Total reads                                    | 6,747,965                      | 8,300,694                      |
| High-quality reads (19 to 25 nt)               | 5,615,974                      | 4,274,873                      |
| Matching Sugarcane Gene Index (%)              | 2,931,453 (52%)                | 2,170,365 (51%)                |
| Matching Sugarcane BAC sequences (%)           | 796,796 (14%)                  | 591,764 (14%)                  |
| Perfect matches to masked genomes <sup>a</sup> | 945,479 (17%)                  | 505,962 (12%)                  |
| Perfect matches to transcriptomes <sup>a</sup> | 996,179 (18%)                  | 534,008 (12%)                  |
| Other cellular small RNAs (%)                  |                                |                                |
| rRNA (%)                                       | 6,377 (0.001%)                 | 5,332 (0.001%)                 |
| tRNA (%)                                       | 6,662 (0.001%)                 | 7,071 (0.001%)                 |
| rasiRNA (%) <sup>b</sup>                       | 1,273,787 (23%)                | 761,824 (18%)                  |

<sup>a</sup>Genome and transcriptome data from sorghum, rice, and *Arabidopsis thaliana*.

<sup>b</sup>sRNAs matching transposable elements or repeat sequences present in sugarcane ESTs and/or publicly available BACs.

**Supplementary Table S3.** *Sugarcane EST sequences similar to miniature inverted-repeat transposable elements (MITEs) and their associated small RNA (sRNA) sequences.*

| No. | EST ID   | evalue   | MITE annotation     | MITE name    | sRNA ID | sRNA sequence (5'-3')                 | Size (nt) | Inactive bud (0 DAP) <sup>b</sup> | Active Bud (2 DAP) <sup>b</sup> |
|-----|----------|----------|---------------------|--------------|---------|---------------------------------------|-----------|-----------------------------------|---------------------------------|
| 1   | TC127268 | 1.9e-19  | <i>Tourist type</i> | <i>MiSc1</i> | 7196    | UUAGGCUUAAAAGAUUCGUCUCG <sup>a</sup>  | 23        | 1.2                               | 7.3                             |
|     |          |          |                     |              | 13790   | AUUAGGCUUAAAAGAUUCGUCUCG <sup>a</sup> | 24        | 1.6                               | 12.2                            |
|     |          |          |                     |              | 24967   | UAGGCUUAAAAGAUUCGUCUCG <sup>a</sup>   | 22        | 0.5                               | 7.3                             |
|     |          |          |                     |              | 19629   | UUAGGCUUAAAAGAUUCGUCUCGU <sup>a</sup> | 24        | 1.2                               | 4.4                             |
| 2   | TC141274 | 3.60e-13 | <i>Tourist type</i> | <i>MiSc2</i> | 7196    | UUAGGCUUAAAAGAUUCGUCUCG <sup>a</sup>  | 23        | 1.2                               | 7.3                             |
|     |          |          |                     |              | 13790   | AUUAGGCUUAAAAGAUUCGUCUCG <sup>a</sup> | 24        | 1.6                               | 12.2                            |
|     |          |          |                     |              | 24967   | UAGGCUUAAAAGAUUCGUCUCG <sup>a</sup>   | 22        | 0.5                               | 7.3                             |
|     |          |          |                     |              | 19629   | UUAGGCUUAAAAGAUUCGUCUCGU <sup>a</sup> | 24        | 1.2                               | 4.4                             |
| 3   | TC152830 | 1.2e-27  | <i>Tourist type</i> | <i>MiSc3</i> | 7196    | UUAGGCUUAAAAGAUUCGUCUCG <sup>a</sup>  | 23        | 1.2                               | 7.3                             |
|     |          |          |                     |              | 13790   | AUUAGGCUUAAAAGAUUCGUCUCG <sup>a</sup> | 24        | 1.6                               | 12.2                            |
|     |          |          |                     |              | 24967   | UAGGCUUAAAAGAUUCGUCUCG <sup>a</sup>   | 22        | 0.5                               | 7.3                             |
|     |          |          |                     |              | 19629   | UUAGGCUUAAAAGAUUCGUCUCGU <sup>a</sup> | 24        | 1.2                               | 4.4                             |
| 4   | CA282419 | 1.3e-28  | <i>Tourist type</i> | <i>MiSc4</i> | 13790   | AUUAGGCUUAAAAGAUUCGUCUCG <sup>a</sup> | 24        | 1.6                               | 12.2                            |
|     |          |          |                     |              | 24967   | UAGGCUUAAAAGAUUCGUCUCG <sup>a</sup>   | 22        | 0.5                               | 7.3                             |
|     |          |          |                     |              | 7196    | UUAGGCUUAAAAGAUUCGUCUCG <sup>a</sup>  | 23        | 1.2                               | 7.3                             |
|     |          |          |                     |              | 19629   | UUAGGCUUAAAAGAUUCGUCUCGU <sup>a</sup> | 24        | 1.2                               | 4.4                             |
| 5   | CA255688 | 2.8e-37  | <i>Tourist type</i> | <i>MiSc5</i> | 7196    | UUAGGCUUAAAAGAUUCGUCUCG <sup>a</sup>  | 23        | 1.2                               | 7.3                             |
|     |          |          |                     |              | 13790   | AUUAGGCUUAAAAGAUUCGUCUCG <sup>a</sup> | 24        | 1.6                               | 12.2                            |
|     |          |          |                     |              | 19629   | UUAGGCUUAAAAGAUUCGUCUCGU <sup>a</sup> | 24        | 1.2                               | 4.4                             |
|     |          |          |                     |              | 24967   | UAGGCUUAAAAGAUUCGUCUCG <sup>a</sup>   | 22        | 0.5                               | 7.3                             |
| 6   | CA129136 | 1.3e-05  | <i>Tourist type</i> | <i>MiSc6</i> | 7196    | UUAGGCUUAAAAGAUUCGUCUCG <sup>a</sup>  | 23        | 1.2                               | 7.3                             |
|     |          |          |                     |              | 13790   | AUUAGGCUUAAAAGAUUCGUCUCG <sup>a</sup> | 24        | 1.6                               | 12.2                            |
|     |          |          |                     |              | 19629   | UUAGGCUUAAAAGAUUCGUCUCGU <sup>a</sup> | 24        | 1.2                               | 4.4                             |
|     |          |          |                     |              | 24967   | UAGGCUUAAAAGAUUCGUCUCG <sup>a</sup>   | 22        | 0.5                               | 7.3                             |

Supplementary Table S3. *Continued*

| No. | EST ID   | evaluate | MITE annotation                  | MITE name    | sRNA ID               | sRNA sequence (5'-3')    | Size (nt) | Inactive bud (0 DAP) <sup>b</sup> | Active Bud (2 DAP) <sup>b</sup> |
|-----|----------|----------|----------------------------------|--------------|-----------------------|--------------------------|-----------|-----------------------------------|---------------------------------|
| 7   | CA168146 | 4.1e-18  | <i>Pangrangja</i>                | <i>MiSc7</i> | 20347                 | GUCCAAAGAUUCGAUGUGACAGUU | 24        | 3.2                               | 2.3                             |
| 8   | CA238633 | 6.3e-20  | <i>MITE-adh, type B</i>          | <i>MiSc8</i> | 15153                 | UUUGACCACUCGUCUUAUUC     | 20        | 11                                | 0.1                             |
|     |          |          |                                  |              | 1267                  | CCACUCGUCUUAUUCAAAAA     | 20        | 7.7                               | 12.4                            |
| 9   | CF574551 | 6.2e-06  | <i>Stowaway foldback element</i> | <i>MiSc9</i> | 29098                 | UCUUAUAAUUUGGAAUGGAGG    | 21        | 9.1                               | 6.1                             |
|     |          |          |                                  |              | 14685                 | GUCUUAUAAUUUGGAACGGAGGGA | 24        | 2.3                               | 1.9                             |
|     |          |          |                                  |              | 7788                  | UCUUAUAAUUUGGAACGGAGGGAG | 24        | 10.3                              | 1.9                             |
|     |          |          |                                  |              | 27121                 | UUAUAAUUUGGAACGGAGGGAG   | 22        | 2.3                               | 1.6                             |
|     |          |          |                                  |              | 4174                  | UCUUAUAAUUUGGGAUGGAGGG   | 22        | 2.8                               | 0.9                             |
|     |          |          |                                  |              | 30070                 | UCUUAUAAUUUGGGAUGGAGG    | 21        | 5.9                               | 4                               |
|     |          |          |                                  | 27767        | UCUUAUAAUUUGGAACGGAGG | 21                       | 4.1       | 1.4                               |                                 |

<sup>a</sup>small RNA sequences that perfectly match different MITE copies.

<sup>b</sup>Normalized expression of transcripts per million (TPM).

**Supplementary Table S4.** Total reads of known and novel sugarcane microRNAs (miRNAs) candidates identified in the axillary bud libraries

| miRNA family | Sequence (5'-3')                         | Size (nt) | Inactive bud (0 DAP) | Active Bud (2 DAP) | Sugarcane miRNA Precursor <sup>a</sup> | Alignment Positions (bases) <sup>b</sup> |
|--------------|------------------------------------------|-----------|----------------------|--------------------|----------------------------------------|------------------------------------------|
| <b>Known</b> |                                          |           |                      |                    |                                        |                                          |
| miR156       | <b>UUGACAGAAGAGAGUGAGCAC<sup>c</sup></b> | <b>21</b> | <b>14</b>            | <b>25</b>          | <b>SsMIR156b/c</b>                     | <b>303-323</b>                           |
| miR159       | AUUGGAUUGAAGGGAGCUCUG                    | 21        | 33                   | 43                 | sof-MIR159c                            | 45-64                                    |
|              | CUUGGAUUGAAGGGAGCUCC                     | 21        | 30                   | 16                 | sof-MIR159c                            | 199-218                                  |
|              | CUUGGAUUGAAGGGAGCUCUG                    | 21        | 94                   | 37                 | sof-MIR159c                            | 199-217                                  |
|              | GUUGGAUUGAAGGGAGCUCUG                    | 21        | 14                   | 9                  | sof-MIR159c                            | 200-217                                  |
|              | UAUGGAUUGAAGGGAGCUCUG                    | 21        | 1567                 | 552                | SsMIR159                               | 223-243                                  |
|              | UCUGGAUUGAAGGGAGCUCUG                    | 21        | 1352                 | 442                | SsMIR159                               | 223-243                                  |
|              | UGGAUUGAAGGGAGCUCUGCA                    | 21        | 37                   | 8                  | SsMIR159                               | 225-245                                  |
|              | UGUGGAUUGAAGGGAGCUCUG                    | 21        | 1317                 | 442                | SsMIR159                               | 223-243                                  |
|              | UUGGAUUGAAGGGAGCUCUGA                    | 21        | 32                   | 6                  | SsMIR159                               | 224-243                                  |
|              | UUGGAUUGAAGGGAGCUCUGC                    | 21        | 999                  | 235                | SsMIR159                               | 224-244                                  |
|              | UUGGAUUGAAGGGAGCUCUUU                    | 21        | 41                   | 14                 | SsMIR159                               | 224-242                                  |
|              | UUUGAAUUGAAGGGAGCUCUG                    | 21        | 62                   | 22                 | SsMIR159                               | 223-243                                  |
|              | UUUGCAUUGAAGGGAGCUCUG                    | 21        | 31                   | 14                 | SsMIR159                               | 223-243                                  |
|              | UUUGGAAUGAAGGGAGCUCUG                    | 21        | 23                   | 10                 | SsMIR159                               | 223-243                                  |
|              | UUUGGACUGAAGGGAGCUCUG                    | 21        | 97                   | 21                 | SsMIR159                               | 223-243                                  |
|              | UUUGGAUJAGAAGGGAGCUCUG                   | 21        | 23                   | 6                  | SsMIR159                               | 223-243                                  |
|              | UUUGGAUCGAAGGGAGCUCUG                    | 21        | 148                  | 57                 | SsMIR159                               | 223-243                                  |
|              | UUUGGAUJGAAGGGAGCUCUG                    | 21        | 16                   | 4                  | SsMIR159                               | 223-243                                  |
|              | UUUGGAUUAAAGGGAGCUCUG                    | 21        | 95                   | 46                 | SsMIR159                               | 223-243                                  |
|              | UUUGGAUJCAAGGGAGCUCUG                    | 21        | 80                   | 37                 | SsMIR159                               | 223-243                                  |
|              | UUUGGAUUGAAAGGGAGCUCUG                   | 21        | 148                  | 51                 | SsMIR159                               | 223-243                                  |
|              | UUUGGAUUGAACGGAGCUCUG                    | 21        | 145                  | 57                 | SsMIR159                               | 223-243                                  |
|              | UUUGGAUUGAAGAGAGCUCUG                    | 21        | 153                  | 48                 | SsMIR159                               | 223-243                                  |
|              | UUUGGAUUGAAGCGAGCUCUG                    | 21        | 311                  | 110                | SsMIR159                               | 223-243                                  |
|              | UUUGGAUUGAAGGAAGCUCUG                    | 21        | 82                   | 35                 | SsMIR159                               | 223-243                                  |
|              | UUUGGAUUGAAGGCAGCUCUG                    | 21        | 154                  | 50                 | SsMIR159                               | 223-243                                  |
|              | UUUGGAUUGAAGGGAACUCUG                    | 21        | 86                   | 32                 | SsMIR159                               | 223-243                                  |
|              | UUUGGAUUGAAGGGACCUCUG                    | 21        | 291                  | 113                | SsMIR159                               | 223-243                                  |
|              | UUUGGAUUGAAGGGAGAUCUG                    | 21        | 21                   | 15                 | SsMIR159                               | 223-243                                  |
|              | UUUGGAUUGAAGGGAGCUCAG                    | 21        | 27                   | 9                  | SsMIR159                               | 223-243                                  |
|              | UUUGGAUUGAAGGGAGCUCCG                    | 21        | 138                  | 59                 | SsMIR159                               | 223-243                                  |

Supplementary Table S4. Continued

| miRNA family | Sequence (5'-3')             | Size (nt) | Inactive bud (0 DAP) | Active Bud (2 DAP) | Sugarcane miRNA Precursor (EST) <sup>a</sup> | Alignment Positions (bases) <sup>b</sup> |
|--------------|------------------------------|-----------|----------------------|--------------------|----------------------------------------------|------------------------------------------|
|              | UUUGGAUUGAAGGGAGCUCGG        | 21        | 65                   | 16                 | SsMIR159                                     | 223-243                                  |
|              | UUUGGAUUGAAGGGAGCUCUA        | 21        | 596                  | 195                | SsMIR159                                     | 223-242                                  |
|              | UUUGGAUUGAAGGGAGCUCUC        | 21        | 110                  | 34                 | SsMIR159                                     | 223-242                                  |
|              | <b>UUUGGAUUGAAGGGAGCUCUG</b> | <b>21</b> | <b>550942</b>        | <b>196147</b>      | <b>SsMIR159</b>                              | <b>223-243</b>                           |
|              | UUUGGAUUGAAGGGAGCUCUU        | 21        | 395                  | 139                | SsMIR159                                     | 223-242                                  |
|              | UUUGGAUUGAAGGGAGGUCUG        | 21        | 19                   | 9                  | SsMIR159                                     | 223-243                                  |
|              | UUUGGAUUGAAGGGAGUUCUG        | 21        | 226                  | 62                 | SsMIR159                                     | 223-243                                  |
|              | UUUGGAUUGAAGGGAGCUCUG        | 21        | 423                  | 183                | SsMIR159                                     | 223-243                                  |
|              | UUUGGAUUGAAGGGCGCUCUG        | 21        | 294                  | 151                | SsMIR159                                     | 223-243                                  |
|              | UUUGGAUUGAAGGGGCUCUG         | 21        | 142                  | 58                 | SsMIR159                                     | 223-243                                  |
|              | UUUGGAUUGAAGGGUGCUCUG        | 21        | 32                   | 6                  | SsMIR159                                     | 223-243                                  |
|              | UUUGGAUUGAAGGUAGCUCUG        | 21        | 403                  | 159                | SsMIR159                                     | 223-243                                  |
|              | UUUGGAUUGAAGUGAGCUCUG        | 21        | 482                  | 166                | SsMIR159                                     | 223-243                                  |
|              | UUUGGAUUGAAUGGAGCUCUG        | 21        | 202                  | 71                 | SsMIR159                                     | 223-243                                  |
|              | UUUGGAUUGACGGGAGCUCUG        | 21        | 147                  | 57                 | SsMIR159                                     | 223-243                                  |
|              | UUUGGAUUGAGGGGAGCUCUG        | 21        | 93                   | 25                 | SsMIR159                                     | 223-243                                  |
|              | UUUGGAUUGAUGGGAGCUCUG        | 21        | 42                   | 14                 | SsMIR159                                     | 223-243                                  |
|              | UUUGGAUUGCAGGGAGCUCUG        | 21        | 51                   | 20                 | SsMIR159                                     | 223-243                                  |
|              | UUUGGAUUGGAGGGAGCUCUG        | 21        | 100                  | 31                 | SsMIR159                                     | 223-243                                  |
|              | UUUGGAUUGUAGGGAGCUCUG        | 21        | 30                   | 4                  | SsMIR159                                     | 223-243                                  |
|              | UUUGGAUUUAAGGGAGCUCUG        | 21        | 154                  | 74                 | SsMIR159                                     | 223-243                                  |
|              | UUUGGCUUGAAGGGAGCUCUG        | 21        | 121                  | 44                 | SsMIR159                                     | 223-243                                  |
|              | UUUGGGUUGAAGGGAGCUCUG        | 21        | 117                  | 63                 | SsMIR159                                     | 223-243                                  |
|              | UUUGGUUUGAAGGGAGCUCUG        | 21        | 44                   | 10                 | SsMIR159                                     | 223-243                                  |
|              | UUUGUAUUGAAGGGAGCUCUG        | 21        | 94                   | 58                 | SsMIR159                                     | 223-243                                  |
| miR160       | <b>UGCCUGGCUCCCUGUAUGCCA</b> | <b>21</b> | <b>177</b>           | <b>974</b>         | <b>n.d.</b>                                  | <b>n.d.</b>                              |
| miR162       | UCGAUAAACCUCUGCAUCCAG        | 21        | 497                  | 503                | n.d.                                         | n.d.                                     |
| miR164       | <b>UGGAGAAGCAGGGCAGGUGCA</b> | <b>21</b> | <b>34</b>            | <b>148</b>         | <b>n.d.</b>                                  | <b>n.d.</b>                              |
| miR166       | UAGGACCAGGCUUCAUUC CCC       | 21        | 12                   | 16                 | CN607727                                     | 178-196                                  |
|              | UCGGACCAGGCCUCAUUC CCC       | 21        | 16                   | 19                 | CN607727                                     | 176-196                                  |
|              | UCGGACCAGGCUUCAAUUC CCC      | 21        | 1044                 | 2141               | CN607727                                     | 176-195                                  |
|              | UCGGACCAGGCUUCAUUC CCC       | 21        | 9                    | 15                 | CN607727                                     | 176-196                                  |

Supplementary Table S4. Continued

| miRNA family | Sequence (5'-3')              | Size (nt) | Inactive bud (0 DAP) | Active Bud (2 DAP) | Sugarcane miRNA Precursor (EST) <sup>a</sup> | Alignment Positions (bases) <sup>b</sup> |
|--------------|-------------------------------|-----------|----------------------|--------------------|----------------------------------------------|------------------------------------------|
|              | UCGGACCAGGCUUCAUJCCUC         | 21        | 275                  | 956                | CN607727                                     | 176-194                                  |
|              | UCGGACCAGGCUUCCUUC CCC        | 21        | 5                    | 26                 | CN607727                                     | 176-196                                  |
|              | UCUCGGACCAGGCUUCAUJCC         | 21        | 158                  | 88                 | CN607727                                     | 174-194                                  |
|              | UUUCGGACCAGGCUUCAUJCC         | 21        | 15                   | 8                  | CN607727                                     | 174-194                                  |
| miR167       | UGAAGCUGCCAGCAUGAUCUA         | 21        | 24                   | 14                 | SsMIR167                                     | 3-22                                     |
|              | UGAAGCUGCCAGCAUGAUCUG         | 21        | 20                   | 35                 | SsMIR167                                     | 3-23                                     |
| miR168       | UAGCUJGGUGCAGAUJGGGAC         | 21        | 30                   | 65                 | SsMIR168                                     | 18-38                                    |
|              | UCGCUJGGCGCAGAUJGGGAC         | 21        | 10                   | 17                 | SsMIR168                                     | 18-38                                    |
|              | UCGCUJGGGGCAGAUJGGGAC         | 21        | 14                   | 31                 | SsMIR168                                     | 18-38                                    |
|              | UCGCUJGGUGCAGAUJGGGAC         | 21        | 6424                 | 16661              | SsMIR168                                     | 18-38                                    |
|              | UGGCUJGGUGCAGAUJGGGAC         | 21        | 9                    | 33                 | SsMIR168                                     | 18-38                                    |
|              | UJGCUJGGUGCAGAUJGGGAC         | 21        | 11                   | 23                 | SsMIR168                                     | 18-38                                    |
| miR169       | CAGCCAAGGAUGACUJGCCGG         | 21        | 37                   | 16                 | SsMIR169                                     | 3-22                                     |
| miR171       | <b>UGAGCCGAACCAAUAUCACUC</b>  | <b>21</b> | <b>41</b>            | <b>510</b>         | <b>n.d.</b>                                  | <b>n.d.</b>                              |
|              | UGAGCCGAAUCAAAUAUCACUC        | 21        | 1                    | 71                 | n.d.                                         | n.d.                                     |
|              | UGAUJGAGCCGUGCCAAUAUC         | 21        | 26                   | 565                | n.d.                                         | n.d.                                     |
|              | UJGAGCCGUGCCAAUAUCACG         | 21        | 58                   | 781                | n.d.                                         | n.d.                                     |
| miR172       | AGAAUCUJGAUGAUCUGCAU          | 21        | 7                    | 14                 | n.d.                                         | n.d.                                     |
| miR319       | UJGGACUGAAGGGGCGUC CCCU       | 21        | 28                   | 3                  | SsMIR319                                     | 15-35                                    |
|              | UJGGACUGAAGGGGGCGUC CCCU      | 21        | 27                   | 7                  | SsMIR319                                     | 15-35                                    |
|              | <b>UJGGACUGAAGGGUGUC CCCU</b> | <b>21</b> | <b>14457</b>         | <b>3268</b>        | <b>SsMIR319</b>                              | <b>15-35</b>                             |
| miR393       | UCCAAAGGGAUJGCAUJGAUC         | 21        | 44                   | 20                 | n.d.                                         | n.d.                                     |
| miR394       | UJGGCAUUCUGUJCCACCUCC         | 20        | 49                   | 60                 | n.d.                                         | n.d.                                     |
| miR395       | UGAAGUGUUJGGGGGAACUC          | 20        | 17                   | 32                 | n.d.                                         | n.d.                                     |
| miR396       | UCCACAGGCUUUCUJGAACUG         | 21        | 482                  | 302                | SsMIR396                                     | 8-21                                     |
|              | UJCCACAGCUUUCUJGAACUG         | 21        | 29                   | 18                 | SsMIR396                                     | 1-21                                     |
| miR397       | UCAUJGAGUGCAGCGUJGAUG         | 21        | 0                    | 29                 | n.d.                                         | n.d.                                     |
| miR398       | UGUGUUCUCAGGUCGCCCCCG         | 21        | 0                    | 23                 | n.d.                                         | n.d.                                     |
| miR399       | UGCCAAAGGAGAGUJGCCCUJG        | 21        | 31                   | 7                  | n.d.                                         | n.d.                                     |
| miR408       | CUGCACUGCCUCUJCCCUJGGC        | 21        | 5                    | 39                 | SsMIR408                                     | 158-178                                  |
| miR444       | <b>UGCAGUJGUJGCCUCAAGCUU</b>  | <b>21</b> | <b>3</b>             | <b>29</b>          | <b>SsMIR444a</b>                             | <b>84-104</b>                            |
| miR444b.2    | UGCAGUJGUJGUCUCAAGCUU         | 21        | 5                    | 15                 | SsMIR444b                                    | 82-102                                   |



Supplementary Table S4. *Continued*

| miRNA family                  | Sequence (5'-3')             | Size (nt) | Inactive bud (0 DAP) | Active Bud (2 DAP) | Sugarcane miRNA Precursor (EST) <sup>a</sup> | Alignment Positions(bases) <sup>b</sup> |
|-------------------------------|------------------------------|-----------|----------------------|--------------------|----------------------------------------------|-----------------------------------------|
| miR444d.3                     | UUGUGGCUUUCUUGCAAGUUG        | 21        | 13                   | 29                 | ssp-MIR444b                                  | 64-84                                   |
| miR529                        | <b>AGAAGAGAGAGAGUACAGCCU</b> | <b>21</b> | <b>61</b>            | <b>88</b>          | <b>n.d.</b>                                  | <b>n.d.</b>                             |
|                               | GAAGAGAGAGAGUACAGCCU         | 20        | 41                   | 0                  | n.d.                                         | n.d.                                    |
| miR827                        | UUAGAUGACCAUCAGCAAACA        | 21        | 121                  | 373                | SsMIR827                                     | 106-126                                 |
|                               | UUAGAUGACCAUCAGCGAACA        | 21        | 18                   | 69                 | SsMIR827                                     | 106-126                                 |
|                               | UUAGAUGGCCAUCAGCAAACA        | 21        | 16                   | 201                | SsMIR827                                     | 106-126                                 |
| miR1878                       | ACUUAGUCUGGAUACUAUAAAAGA     | 24        | 224                  | 44                 | n.d.                                         | n.d.                                    |
| <b>Novel miRNA candidates</b> |                              |           |                      |                    |                                              |                                         |
| miRcand1                      | CCTTGTCTTATCCTCCCTCGA        | 21        | 80                   | 3                  | CA257509                                     | 92-112                                  |
|                               | CCTTGTCTTATCCTCCCTCGA        | 21        | 47                   | 0                  | CA257509                                     | 92-112                                  |
|                               | GCCTTGTCTTATCCTCCCTCG        | 21        | 45                   | 2                  | CA257509                                     | 91-111                                  |
| miRcand2                      | UGGGGAAGCAAUUCGUCGAAC        | 21        | 0                    | 127                | CA222602                                     | 167-187                                 |
|                               | <b>UGGGGGAGCAAUUCGUCGAAC</b> | <b>21</b> | <b>165</b>           | <b>2141</b>        | <b>CA222602</b>                              | <b>167-187</b>                          |

<sup>a</sup>Sugarcane miRNA precursors described in Zanca *et al.* (2010) and/or identified in this work with sRNA matches.

<sup>b</sup>Position in the miRNA precursor sequence in which a particular sRNA is aligned, when applicable.

<sup>c</sup>miRNA sequences in **bold** were used as templates for the stem-loop RT-qPCR primers.

n.d. Not determined.

**Supplementary Table S5. Predicted target sequences of known and novel sugarcane microRNAs (miRNAs) identified in the axillary bud libraries**

| miRNA family        | Target gene                                  | Score <sup>a</sup> | Putative function                                              |
|---------------------|----------------------------------------------|--------------------|----------------------------------------------------------------|
| <b>Known miRNAs</b> |                                              |                    |                                                                |
| miR156              | Described in Zanca <i>et al.</i> 2010        | 1                  | Squamosa promoter binding protein-like proteins (SPLs)         |
| miR159              | Described in Zanca <i>et al.</i> 2010        | 2                  | GAMyb-like protein                                             |
| miR160              | TC149461, CF574323, TC141423                 | 1                  | ARF protein                                                    |
| miR162              | n.d. <sup>b</sup>                            | n.d.               | n.d.                                                           |
| miR164              | CA293713, CA274870, CA285948                 | 1                  | NAC family transcription factor                                |
| miR166              | CA226194,TC99735,TC93578, TC85112            | 2                  | Class III HD-Zip protein                                       |
| miR167              | Described in Zanca <i>et al.</i> 2010        | 2, 3               | Auxin response factor                                          |
| miR168              | Described in Zanca <i>et al.</i> 2010        | 3                  | ARGONAUTE1 (AGO1)-like protein                                 |
| miR169              | Described in Zanca <i>et al.</i> 2010        | 3                  | CCAAT-box transcription factor complex                         |
| miR171              | TC119571, TC151967                           | 1.5                | GRAS family transcription factor                               |
| miR172              | TC99423, TC112055, TC93872, TC87233, TC81342 | 0.5                | APETALA2-like protein                                          |
| miR319              | Described in Zanca <i>et al.</i> 2010        | 1.5                | TCP family transcription factor                                |
| miR393              | TC80044, TC77356, TC98041                    | 2                  | Auxin signaling F-box 2 protein                                |
| miR394              | TC108201, TC88841                            | 0                  | F-box family protein                                           |
| miR395              | TC151109                                     | 0.5                | ATP sulfurylase                                                |
|                     | CA069883, TC118970                           | 1                  | Putative sulfate transporter                                   |
| miR396              | Described in Zanca <i>et al.</i> 2010        | 1                  | Putative growth-regulating factor                              |
|                     |                                              | 0.5, 1, 3,         |                                                                |
| miR397              | TC142804, CA183151, CA170003, TC117778       | 3                  | Putative laccase precursor                                     |
| miR398              | n.d.                                         | n.d.               | n.d.                                                           |
| miR399              | n.d.                                         | n.d.               | n.d.                                                           |
| miR408              | Described in Zanca <i>et al.</i> 2010        | 3                  | Blue copper-like protein                                       |
| miR444              | Described in Zanca <i>et al.</i> 2010        | 0.5, 2.5           | Putative MIKC-type MADS-box transcription factors              |
| miR444b.2           | Described in Zanca <i>et al.</i> 2010        | 0.5, 1.5, 3        | Putative MIKC-type MADS-box transcription factors              |
| miR444d.3           | Described in Zanca <i>et al.</i> 2010        | 1.5                | Putative MIKC-type MADS-box transcription factors              |
| miR529              | CA228340, CA072223, TC110345, TC73496        | 2.5, 3             | Squamosa promoter binding protein-like proteins (SPLs)         |
| miR827              | Described in Zanca <i>et al.</i> 2010        | 2, 2.5             | SPX (SYG1/Pho81/XPR1) domain-containing protein-like           |
|                     | CA126628, CA251729, TC127041                 | 3                  | DNA (cytosine-5)-methyltransferase 1 domain-containing protein |

**Supplementary Table S5. Continued**

---

| <b>miRNA family</b>                       | <b>Target gene</b> | <b>Score<sup>a</sup></b> | <b>Putative function</b>             |
|-------------------------------------------|--------------------|--------------------------|--------------------------------------|
| miR1878                                   | TC141112           | 3                        | Homolog to Ran-Binding Protein Mog1p |
| <b>Novel miRNA candidates<sup>c</sup></b> |                    |                          |                                      |
| miRcand1                                  | n.d.               | n.d.                     | n.d.                                 |
| miRcand2                                  | CA185455, CA287982 | 1                        | PPR-like proteins                    |

---

<sup>a</sup>Score values based on miRNA target analyzes using both pSRNATarget (Dai and Zhao, 2011) and ScmiRbase (Zanca *et al.*, 2010) servers.

<sup>b</sup>Not detected (n.d.) in publicly available sugarcane sequence databases.

## Figure legends

**Fig. S1.** sRNA distribution between axillary bud libraries and sRNA counts over annotated sugarcane genomic regions. (A) Size distribution of small RNAs in 0-DAP (inactive) and 2-DAP developing buds. (B) sRNA counts over annotated genomic regions of sugarcane ancient species (BAC 51L01 from *Saccharum officinarum* and BAC 265022 from *S. spontaneum*) and the hybrid R70. Peaks on the graphs represent the total counts of the two major classes of sRNAs as described in the text. A graphical representation of the structure of the BAC regions is provided underneath each peak on the graphs. Transposons and retrotransposons are shown as small and large black diamonds, respectively, while MITEs are shown as small black arrows. Genes are represented as grey arrows.

**Fig. S2.** Predicted miRNA harpins identified in this study by using EST sequences and the mFOLD program.

**Fig. S3.** Multiple sequence alignments of sugarcane miR159 mature sequences. The alignments were done using ClustalW program and assigned to two distinct sugarcane *MIR159* precursors.

**Fig. S4.** Expression profiles of sugarcane reference genes evaluated through RT-qPCR in 0-, 2-, and 5-DAP developing axillary buds of sugarcane hybrid SP80-3280. All RT-qPCR experiments used inactive bud (0 DAP) as the reference sample (set to 1.0). Error bars indicate standard deviation of three biological replicates. Distinct letters indicate the significant differences at  $P < 0.05$  level by Student's t-test. R.E., relative expression.

**Fig. S5.** Concentrations of ABA and its catabolite dihydrophaseic acid (DPA) were monitored in 0-, 2-, and 5-DAP axillary buds and expressed in nanograms per gram of dry weight (ng/g DW). Error bars indicate standard deviation of three replicates.

Fig. S1

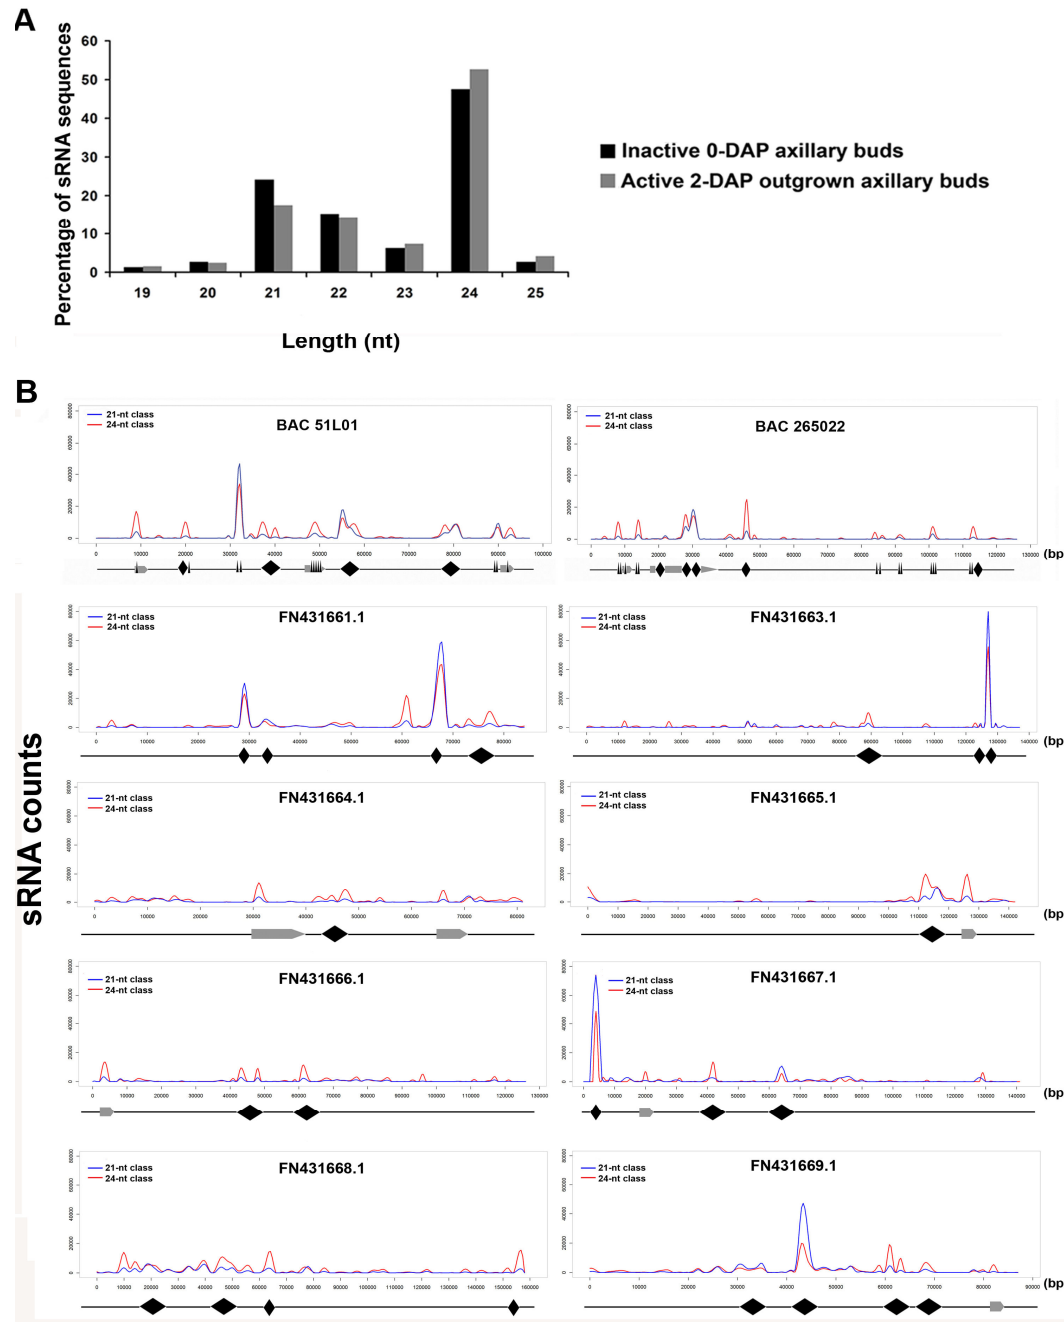

Fig. S2

**SsMIRcand1**  
(111 bp)

```

          UCUUUGAACUA      AGUG      CU      -      GAA--  CC  A
UACCGUU      AGUCG      UCGAGG  GGAUG GAUAAGGCC      UC  CG U
GUGGUAG      UCAGU      AGCUCC  CCUAU CUGUUCGG      AG  GC A
          -----      GGG-      CU      U      GCAAG  CC  U
    
```

$\Delta G = -43.60$

**SsMIR166**  
(145 bp)

```

          U  UCU  U  UU      A      UUGC      -  UUCG  GG
GAAGCUAUU GCU  GAG GGAAUG  GUCUGGUUC AGGUCUCGC  GAUUUAAGGA UGA  UGCAU \
CUUCGAUAA CGA  CUC CCUUAC  CCGACCAGG UCUAGGGUG  CUAAGUCCU AUU  AUGUG C
          -  ---  C  UU      C      U---      U  UUUG  UA
    
```

$\Delta G = -70.30$

**SsMIRcand2**  
(129 bp)

```

          GA  U-      C      -      U  G      C  C--  AGC  UU  C
CCG  GC  GGCCUG  CGUGGG GAAGCAA UCGUC  AACGGCUG  AG  GCG  UUG  AGGC  U
GGC  CG  CCGGAC  GUACCC CUUCGUU  AGCGG  UUGUCGAC  UC  CGC  AGC  UCCG  G
          UC  UC      C      G      C      -      U  ACA  ACU  --  A
    
```

$\Delta G = -70.50$

**SbMIRcand2**  
(114 bp)

```

          UCC  --      -  A-      A----  G  UA
GGCCUG  UGGG  AAGCAAUUCGUCGAAC  AGCU  GC  GCGCG  GAGG  UGG  G
CCGGAC  ACCC  UUCGUUAAGCGGUUGUCGA  CG  CGCGC  CUCC  ACU  G
          UGU  AU      G  CA  ACUAG  G  CC
    
```

$\Delta G = -67.70$



Fig. S4

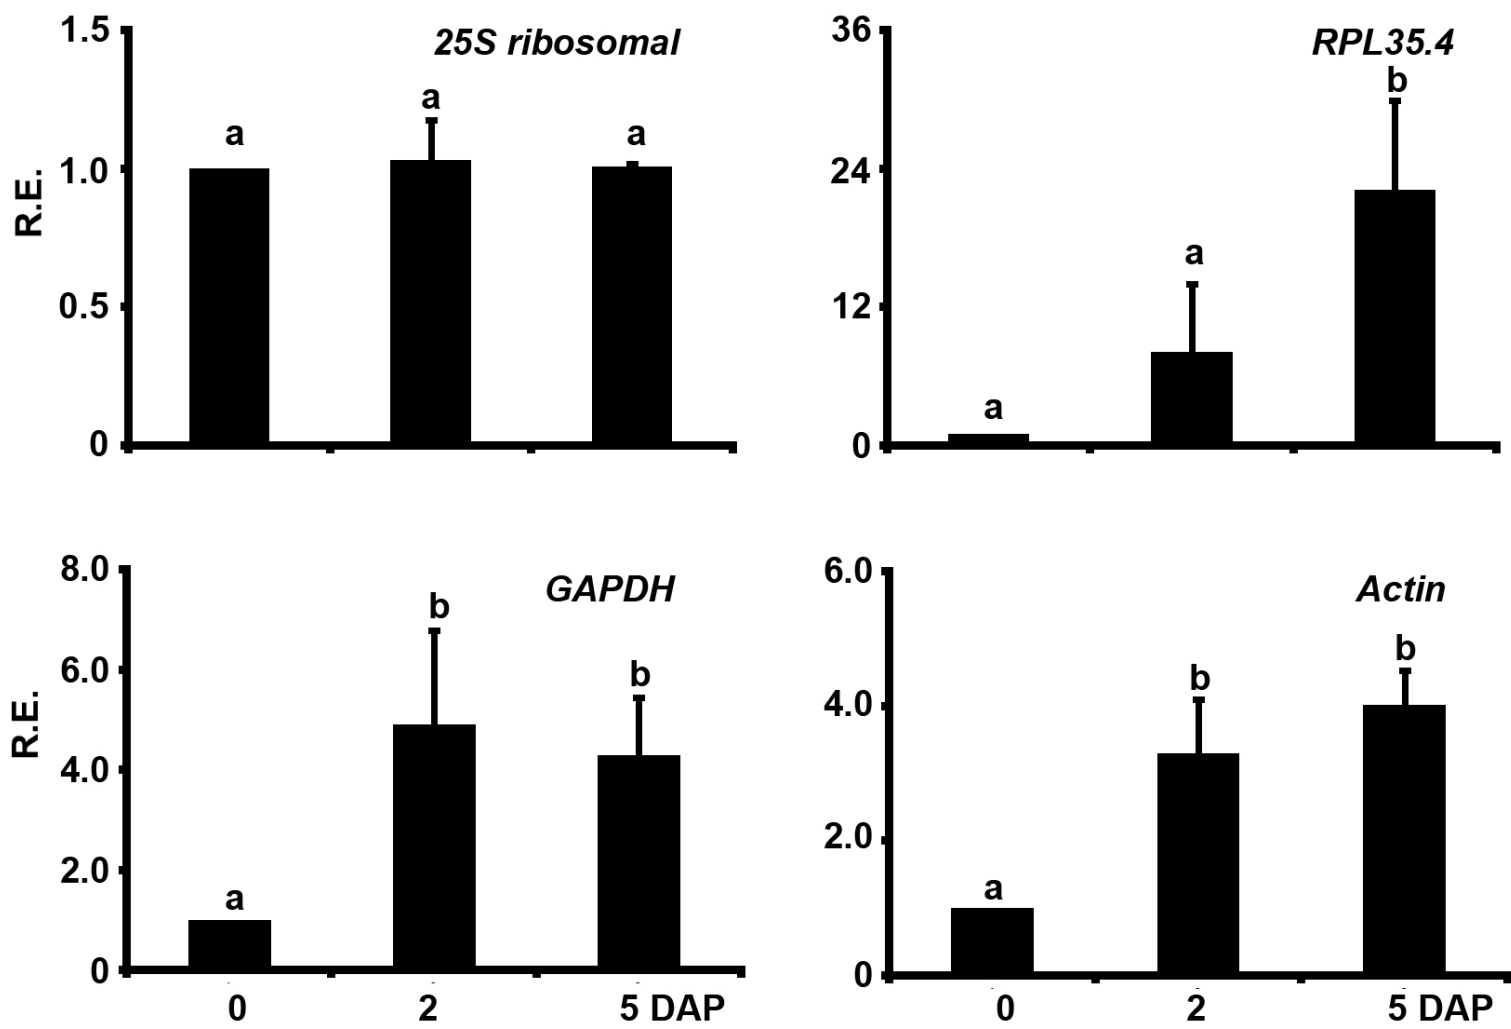



Fig. S5

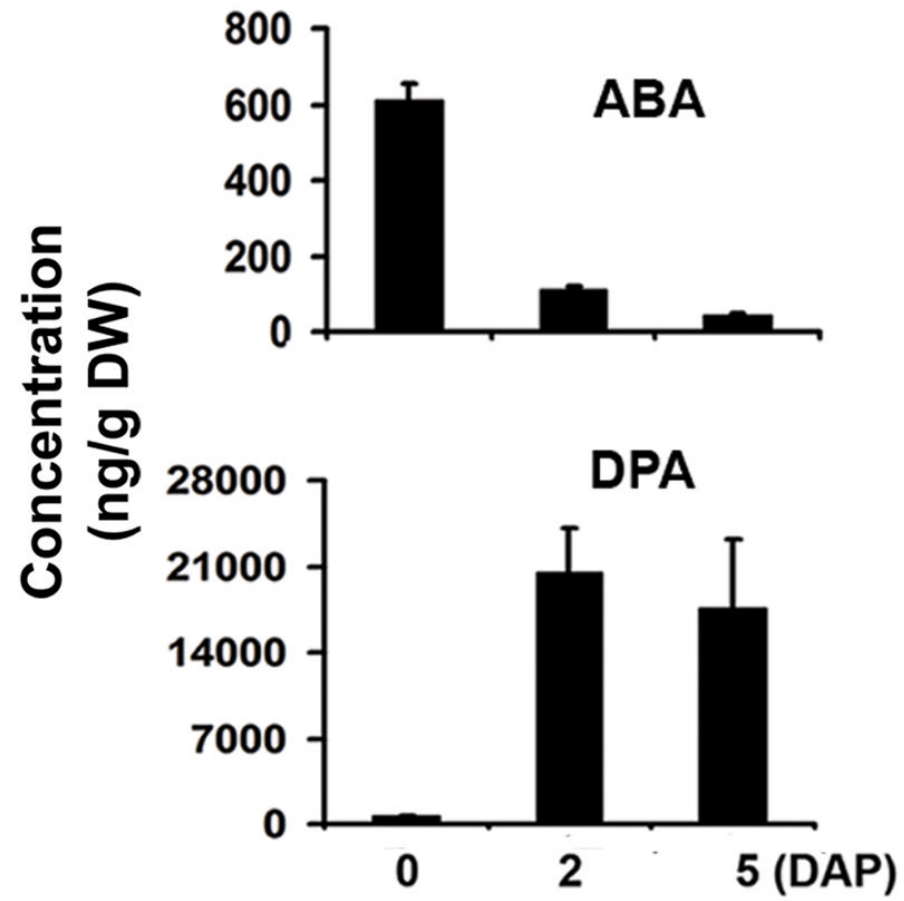

Supplement: supp_ert089_jexbot091066_file001.pdf [file supp_ert089_jexbot091066_file001.pdf]
